# Supplementary material for: Tolerability on Serious Adverse Events of First-Line Bevacizumab and Cetuximab for RAS Wild-Type Metastatic Colorectal Cancer: A Systematic Review and Meta-Analysis
Source: MDPI journal article supplement (doi:10.3390/healthcare10020217), 2022-01-23

Supplementary Table S1. Quality assessment of included RCTs

| RCTs                               | Random<br>sequence<br>generation | Allocation<br>concealment | Blinding of<br>participants<br>and<br>personnel | Blinding<br>outcome<br>assessment | Incomplete<br>outcome<br>data | Selective<br>reporting | Other<br>bias |
|------------------------------------|----------------------------------|---------------------------|-------------------------------------------------|-----------------------------------|-------------------------------|------------------------|---------------|
| ATOM<br>(Oki 2019)                 | L                                | L                         | U                                               | U                                 | L                             | L                      | L             |
| CALGB<br>80405<br>(Venook<br>2017) | L                                | L                         | H                                               | H                                 | L                             | L                      | L             |
| FIRE-3<br>(Heinmann<br>2014)       | L                                | L                         | H                                               | H                                 | L                             | L                      | U             |

Supplementary Table S2. Quality assessment of included observational studies

| Observational Studies           | Selection of participants | Confounding variables | Measurement of intervention | Blinding for outcome assessment | Incomplete outcome data | Selective outcome reporting |
|---------------------------------|---------------------------|-----------------------|-----------------------------|---------------------------------|-------------------------|-----------------------------|
| Bai et al<br>-2016              | L                         | H                     | L                           | H                               | L                       | L                           |
| Dreanic et al<br>2015           | L                         | U                     | L                           | H                               | U                       | U                           |
| Degirmencioglu<br>et al<br>2019 | L                         | L                     | L                           | H                               | H                       | H                           |
| Kim et al<br>2020               | L                         | U                     | L                           | H                               | L                       | L                           |
| Marques et al<br>2020           | L                         | H                     | L                           | H                               | U                       | U                           |
| Sagawa et al<br>2020            | L                         | U                     | L                           | H                               | L                       | L                           |
| Yang et al<br>2014              | L                         | U                     | L                           | H                               | L                       | U                           |

Supplementary Figure S1. Funnel plot of hematological adverse events

a)

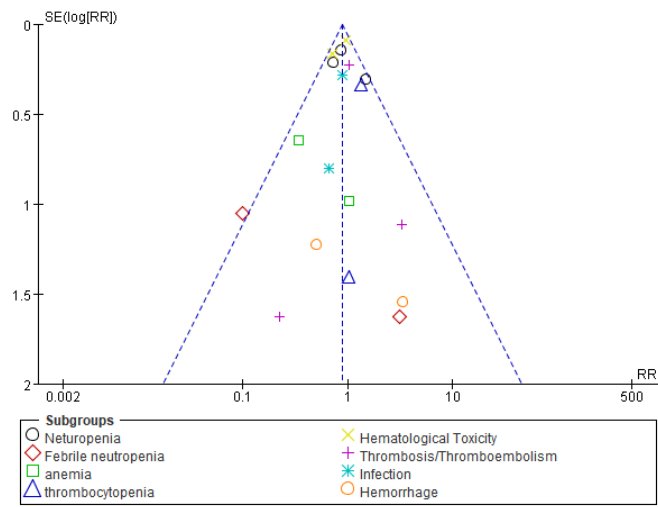

Supplement: s1 [file healthcare-1533555-supplementary.pdf › healthcare-1533555-supplementary.pdf]
